# Supplementary material
Source: PubMed Central journal article supplement (PMC6971490)

SUPPLEMENTARY DATA

**Supplementary Table 1. Association analyses between current shift work ( $n = 189,488$ ) and morningness-eveningness preference ( $n = 169,926$ ) with unadjusted/adjusted odds of type 2 diabetes and mean difference in HbA1c (in mmol/mol) across shift work and morningness-eveningness preference categories in employed UK Biobank participants of European descent.**

|                                           | Type 2 diabetes                 |                         |                                     | N       | HbA1c (mmol/mol)           |                                       |
|-------------------------------------------|---------------------------------|-------------------------|-------------------------------------|---------|----------------------------|---------------------------------------|
|                                           | Type 2 diabetes cases /controls | Unadjusted OR [95% CI]  | Sleep duration adjusted OR [95% CI] |         | Unadjusted Beta [95% CI]   | Sleep duration adjusted Beta [95% CI] |
| <b>Shift work</b>                         |                                 |                         |                                     |         |                            |                                       |
| Day workers                               | 4,047 /154,792                  | <i>reference</i>        | <i>reference</i>                    | 146,993 | <i>reference</i>           | <i>reference</i>                      |
| Shift work without nights                 | 475 /14,863                     | <b>1.22 [1.11-1.35]</b> | <b>1.26 [1.14-1.39]</b>             | 14,110  | <b>0.29 [0.22-0.35]</b>    | <b>0.33 [0.27-0.39]</b>               |
| Sometimes night shift work                | 284 /8,434                      | <b>1.29 [1.14-1.46]</b> | <b>1.32 [1.17-1.49]</b>             | 8,005   | <b>0.25 [0.17-0.33]</b>    | <b>0.46 [0.38-0.54]</b>               |
| Usual night shift work                    | 80 /2,171                       | <b>1.41 [1.13-1.77]</b> | <b>1.47 [1.17-1.85]</b>             | 2,069   | 0.16 [0-0.32]              | <b>0.43 [0.27-0.58]</b>               |
| Always night shift work                   | 156 /4,186                      | <b>1.43 [1.21-1.68]</b> | <b>1.45 [1.23-1.71]</b>             | 3,979   | <b>0.54 [0.43-0.66]</b>    | <b>0.72 [0.60-0.83]</b>               |
| <b>Morningness-eveningness preference</b> |                                 |                         |                                     |         |                            |                                       |
| Definite-morning                          | 1,272 /42,097                   | <i>reference</i>        | <i>reference</i>                    | 39,976  | <i>reference</i>           | <i>reference</i>                      |
| More morning than evening                 | 1,482 /60,064                   | <b>0.82 [0.76-0.88]</b> | <b>0.86 [0.8-0.93]</b>              | 57,127  | <b>-0.25 [-0.3--0.2]</b>   | <b>-0.12 [-0.17--0.08]</b>            |
| More evening than morning                 | 1,268 /48,593                   | <b>0.86 [0.8-0.93]</b>  | 0.96 [0.89-1.04]                    | 46,267  | <b>-0.28 [-0.32--0.23]</b> | -0.03 [-0.08-0.01]                    |
| Definite-evening                          | 497 /14,653                     | <b>1.12 [1.01-1.25]</b> | <b>1.30 [1.17-1.44]</b>             | 13,886  | <b>-0.17 [-0.24--0.1]</b>  | <b>0.11 [0.04-0.18]</b>               |

**Legend:** Prevalent type 2 diabetes associations are unadjusted and then sex-, age-, and sleep-duration adjusted odds ratios [95% confidence interval]. HbA1c associations are restricted to participants with no prevalent type 2 diabetes. HbA1c associations are unadjusted and then sex-, age-, and sleep-duration adjusted betas [95% confidence interval] in mmol/mol. Bold  $P < 0.05$ .

SUPPLEMENTARY DATA

**Supplementary Table 2. Adjusted odds ratios (OR) or adjusted betas and 95% confidence intervals (CI) of type 2 diabetes and HbA1c (in mmol/mol) with each additional copy of the *MTNR1B* G risk-allele across categories of current work schedule with further adjustment for morningness-eveningness preference ( $n = 169,926$ ).**

|                                   | Type 2 diabetes                 |                  |           | HbA1c (mmol/mol) |                   |           |
|-----------------------------------|---------------------------------|------------------|-----------|------------------|-------------------|-----------|
|                                   | Type 2 diabetes cases /controls | OR [95% CI]      | $P_{int}$ | $N$              | Beta [95% CI]     | $P_{int}$ |
| <b>Overall</b>                    | 4,519 /165,407                  | 1.10 [1.05-1.15] | 0.10      | 157,256          | 0.26 [0.23-0.29]  | 0.34      |
| <b>Day workers</b>                | 3,634 /139,090                  | 1.09 [1.03-1.15] |           | 132,249          | 0.25 [0.22-0.28]  |           |
| <b>Shift work without nights</b>  | 430 /13,389                     | 1.25 [1.07-1.45] |           | 12,720           | 0.32 [0.22-0.42]  |           |
| <b>Sometimes night shift work</b> | 247 /7,450                      | 0.94 [0.76-1.16] |           | 7,074            | 0.35 [0.22-0.48]  |           |
| <b>Usual night shift work</b>     | 70 /1,889                       | 0.84 [0.56-1.27] |           | 1,799            | 0.21 [-0.05-0.46] |           |
| <b>Always night shift work</b>    | 138 /3,589                      | 1.24 [0.94-1.63] |           | 3,414            | 0.18 [-0.01-0.37] |           |

**Legend:** Association results are adjusted odds ratios [95% confidence interval] of type 2 diabetes per each additional copy of the *MTNR1B* G risk-allele or adjusted betas [95% confidence interval] describing differences in HbA1c in mmol/mol per each additional copy of the *MTNR1B* G risk-allele across categories of current work schedule. Association analyses are adjusted for age, sex, BMI, genotyping array, 10 principal components of ancestry, and morningness-eveningness preference.  $P_{int}$  is log likelihood ratio test comparing models with and without cross-product interaction terms (*MTNR1B* and current work schedule) including main effect terms in logistic or linear regression models adjusted for the aforementioned covariates.

SUPPLEMENTARY DATA

**Supplementary Table 3. Adjusted odds ratios (OR) or adjusted betas and 95% confidence intervals (CI) of type 2 diabetes and HbA1c (in mmol/mol) with each additional copy of the *MTNR1B* G risk-allele across categories of morningness-eveningness preference with further adjustment for current work schedule ( $n = 169,926$ ).**

|                                  | Type 2 diabetes                 |                  |           | HbA1c (mmol/mol) |                  |           |
|----------------------------------|---------------------------------|------------------|-----------|------------------|------------------|-----------|
|                                  | Type 2 diabetes cases /controls | OR [95% CI]      | $P_{int}$ | $N$              | Beta [95% CI]    | $P_{int}$ |
| <b>Overall</b>                   | 4,519/165,407                   | 1.10 [1.04-1.15] | 0.044     | 157,256          | 0.26 [0.23-0.29] | 0.86      |
| <b>Definite morning</b>          | 1,272/42,097                    | 1.17 [1.07-1.28] |           | 39,976           | 0.30 [0.25-0.36] |           |
| <b>More morning than evening</b> | 1,482/60,064                    | 1.09 [1.00-1.18] |           | 57,127           | 0.23 [0.19-0.28] |           |
| <b>More evening than morning</b> | 1,268/48,593                    | 1.06 [0.97-1.16] |           | 46,267           | 0.23 [0.18-0.28] |           |
| <b>Definite evening</b>          | 497/14,653                      | 1.01 [0.87-1.18] |           | 13,886           | 0.36 [0.27-0.46] |           |

**Legend:** Association results are adjusted odds ratios [95% confidence interval] of type 2 diabetes per each additional copy of the *MTNR1B* G risk-allele or adjusted betas [95% confidence interval] describing differences in HbA1c in mmol/mol per each additional copy of the *MTNR1B* G risk-allele across categories of morningness-eveningness preference. Association analyses are adjusted for age, sex, BMI, genotyping array, 10 principal components of ancestry, and current work schedule.  $P_{int}$  is log likelihood ratio test comparing models with and without cross-product interaction terms (*MTNR1B* and morningness-eveningness preference) including main effect terms in logistic or linear regression models adjusted for the aforementioned covariates.

SUPPLEMENTARY DATA

**Supplementary Table 4. Sensitivity analyses of morningness-eveningness preference association with adjusted odds of type 2 diabetes ( $n = 298,953$ ) and adjusted mean difference in HbA1c (in mmol/mol;  $n = 272,220$ ) in UK Biobank participants of European descent regardless of employment status.**

|                                           | Type 2 diabetes                 |                                   | HbA1c (mmol/mol) |                                     |
|-------------------------------------------|---------------------------------|-----------------------------------|------------------|-------------------------------------|
|                                           | Type 2 diabetes cases /controls | Sex- and age-adjusted OR [95% CI] | N                | Sex- and age-adjusted Beta [95% CI] |
| <b>Morningness-eveningness preference</b> |                                 |                                   |                  |                                     |
| Definite-morning                          | 3,490 /75,909                   | <i>reference</i>                  | 72,013           | <i>reference</i>                    |
| More morning than evening                 | 4,006 /104,746                  | <b>0.86 [0.82-0.90]</b>           | 99,552           | <b>-0.12 [-0.15--0.08]</b>          |
| More evening than morning                 | 3,455 /81,559                   | 1.01 [0.96-1.06]                  | 77,517           | -0.03 [-0.06-0.01]                  |
| Definite-evening                          | 1,373 /24,415                   | <b>1.40 [1.31-1.49]</b>           | 23,138           | <b>0.17 [0.12-0.22]</b>             |

**Legend:** Prevalent type 2 diabetes associations are sex-, and age- adjusted odds ratios [95% confidence interval]. HbA1c associations are restricted to participants with no prevalent type 2 diabetes. HbA1c associations are sex- and age-, adjusted betas [95% confidence interval] in mmol/mol. Bold  $P < 0.05$ .

SUPPLEMENTARY DATA

**Supplementary Table 5. Sensitivity analyses of morningness-eveningness preference association with adjusted odds of type 2 diabetes ( $n = 298,953$ ) and adjusted mean difference in HbA1c (in mmol/mol;  $n = 272,220$ ) with each additional copy of the *MTNR1B* G in UK Biobank participants of European descent regardless of employment status.**

|                                  | Type 2 diabetes                 |                  |           | HbA1c (mmol/mol) |                  |           |
|----------------------------------|---------------------------------|------------------|-----------|------------------|------------------|-----------|
|                                  | Type 2 diabetes cases /controls | OR [95% CI]      | $P_{int}$ | <i>N</i>         | Beta [95% CI]    | $P_{int}$ |
| <b>Overall</b>                   | 12,324 /286,629                 | 1.10 [1.07-1.14] | 0.17      | 272,220          | 0.24 [0.22-0.26] | 0.83      |
| <b>Definite morning</b>          | 3,490 /75,909                   | 1.14 [1.08-1.2]  |           | 72,013           | 0.26 [0.22-0.30] |           |
| <b>More morning than evening</b> | 4,006 /104,746                  | 1.11 [1.05-1.16] |           | 99,552           | 0.22 [0.18-0.25] |           |
| <b>More evening than morning</b> | 3,455 /81,559                   | 1.07 [1.02-1.13] |           | 77,517           | 0.23 [0.19-0.27] |           |
| <b>Definite evening</b>          | 1,373 /24,415                   | 1.09 [0.99-1.19] |           | 23,138           | 0.27 [0.20-0.35] |           |

**Legend:** Association results are adjusted odds ratios [95% confidence interval] of type 2 diabetes per each additional copy of the *MTNR1B* G risk-allele or adjusted betas [95% confidence interval] describing differences in HbA1c in mmol/mol per each additional copy of the *MTNR1B* G risk-allele across categories of morningness-eveningness preference. Association analyses are adjusted for age, sex, BMI, genotyping array and 10 principal components of ancestry.  $P_{int}$  is log likelihood ratio test comparing models with and without cross-product interaction terms (*MTNR1B* and morningness-eveningness preference) including main effect terms in logistic or linear regression models adjusted for the aforementioned covariates.

SUPPLEMENTARY DATA

**Supplementary Table 6. Characteristics of subset of UK Biobank participants of European descent with up to 7-day actigraphy information.**

|                                     | Employed Participants | All Participants |
|-------------------------------------|-----------------------|------------------|
| <i>N</i>                            | 38,701                | 82,923           |
| Age, years                          | 56.4                  | 62.5             |
| Sex, % male                         | 41.90                 | 43.9             |
| BMI, kg/m <sup>2</sup>              | 26.5                  | 26.7             |
| Type 2 diabetes, <i>n</i> cases (%) | 555 (1.4)             | 2,165 (2.6)      |
| Sleep midpoint, clock time          | 26.91                 | 26.99            |
| Townsend Index*                     | -1.64                 | -1.80            |
| People in Household, <i>n</i> (%)   |                       |                  |
| Husband, Wife or Partner            | 29,166 (75.4)         | 63,354 (76.4)    |
| Son and/or Daughter                 | 21,163 (54.7)         | 29,413 (35.5)    |
| Mother and/or Father                | 149 (0.4)             | 287 (0.3)        |
| Grandchild                          | 809 (2.1)             | 1,285 (1.5)      |
| Other                               | 7 (0.02)              | 10 (0.01)        |

Data are mean (SD), median (interquartile range), or percentages.

\*Positive values of the index will indicate areas with high material deprivation, whereas those with negative values will indicate relative affluence.

SUPPLEMENTARY DATA

**Supplementary Table 7. Associations between quartiles of accelerometer-derived sleep midpoint ( $n = 82,923$ ) with adjusted odds of type 2 diabetes in UK Biobank participants of European descent regardless of employment status.**

|                            | Type 2 diabetes cases /controls | Sex- and age-adjusted OR [95% CI] | Sex- and age- and household status- adjusted OR [95% CI] |
|----------------------------|---------------------------------|-----------------------------------|----------------------------------------------------------|
| <b>Sleep midpoint (Q1)</b> | 590 / 20,141                    | <i>reference</i>                  | <i>reference</i>                                         |
| <b>Sleep midpoint (Q2)</b> | 474 / 20,258                    | <b>0.79 [0.72-0.88]</b>           | <b>0.80 [0.73-0.89]</b>                                  |
| <b>Sleep midpoint (Q3)</b> | 481 / 20,249                    | <b>0.79 [0.71-0.87]</b>           | <b>0.80 [0.72-0.88]</b>                                  |
| <b>Sleep midpoint (Q4)</b> | 620 / 20,110                    | 0.99 [0.88-1.11]                  | 1.00 [0.89-1.12]                                         |

**Legend:** Prevalent type 2 diabetes associations are sex- and age- adjusted odds ratios [95% confidence interval] and bold  $P < 0.05$ . In sensitivity analysis, associations were further adjusted for people residing in the household with the participant (household status).

SUPPLEMENTARY DATA

Supplementary Figure 1. Analysis workflow.

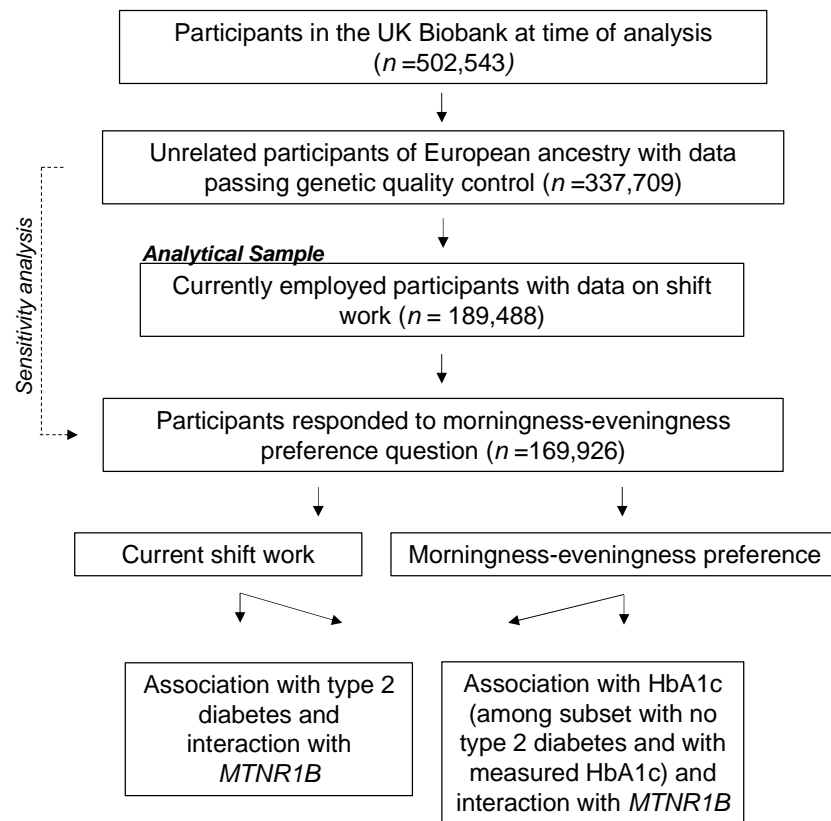



SUPPLEMENTARY DATA

**Supplementary Figure 2. Adjusted odds ratios (OR) of type 2 diabetes with each additional copy of the *MTNR1B* G risk-allele in the overall sample and across categories of morningness-eveningness preference in employed UK Biobank participants of European descent ( $n = 169,926$ ).**

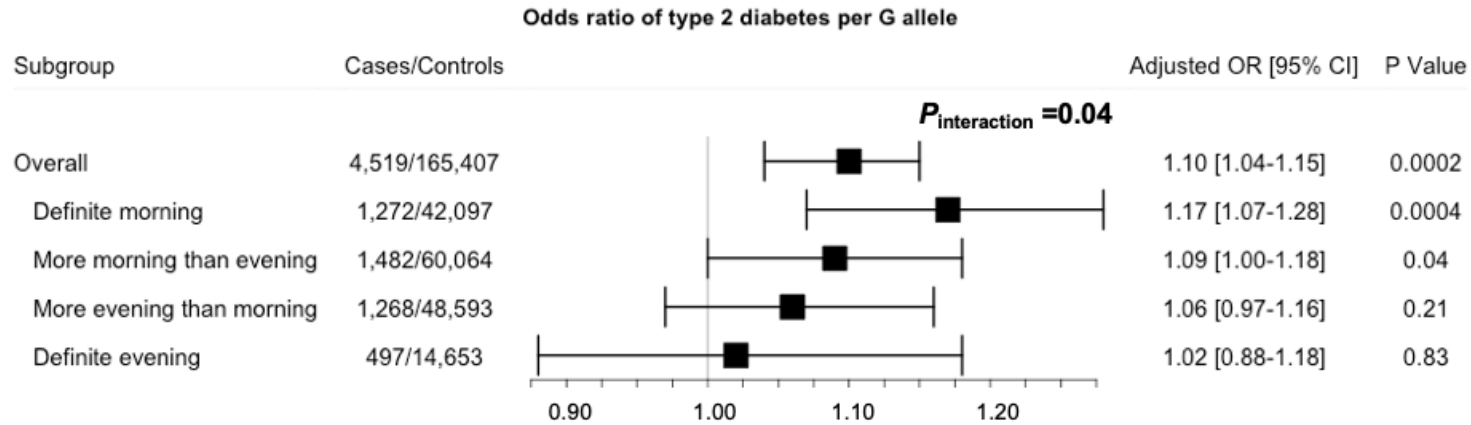

Supplement: DB190606SupplementaryData.pdf [file DB190606SupplementaryData.pdf]
